# Supplementary material for: Antibacterial Mechanisms of Constituents from Galla chinensis Revealed by Experimental and Virtual Screening-Based Studies
Source: Hindawi journal article supplement (doi:10.1155/2024/8963887), 2024-03-18
Supplement: f1 [file 8963887.f1.docx]

**Target prediction of 49 chemical components of *G. chinensis***

The structural files of 49 ligands prepared above were imported into the PharmMapper database (http://lilab-ecust.cn/pharmmapper/index.htmL) to obtain the potential protein target files. The scores from the 49 predicted target files were ranked from high to low, and then the top 30 PDB IDs were imported into the UniProt database (https://www.uniprot.org/uploadlists/). The protein names were converted into standard gene names, and the relevant files of the predicted proteins belonging to the *E. coli* species (ECOLI) were downloaded.

**Construction of *G. chinensis* component-target networks**

Based on the 49 chemical components of *G. chinensis* and the genes corresponding to the proteins belonging to the *E. coli* species as predicted above, the component-target network was constructed via Cytoscape3.7.2[14].

**Supplementary information Table 1. 49** chemical compounds isolated from *Galla Chinensis*.

| classify | Number | Chemical composition | Molecular Formula | Reference |
| --- | --- | --- | --- | --- |
| Tannins | 1 | 1,2,6-Tri-O-galloyl-β-D-glucose | C27H24O18 | [Duan et al. (2004)](https://www.sciencedirect.com/science/article/pii/S0378874121004748?via%3Dihub" \l "bib32) |
|  | 2 | 1,2,3,6-Tetra-O-galloyl-β-D-glucose | C34H28O22 | [Duan et al. (2004)](https://www.sciencedirect.com/science/article/pii/S0378874121004748?via%3Dihub#bib32) |
|  | 3 | 1,2,4,6-Tetra-O-galloyl-β-D-glucose | C34H28O22 | [Kwon et al. (2013)](https://www.sciencedirect.com/science/article/pii/S0378874121004748?via%3Dihub" \l "bib58) |
|  | 4 | 1,2,3,4,6-Penta-O-galloyl-β-D-glucose | C41H32O26 | [Duan et al. (2004)](https://www.sciencedirect.com/science/article/pii/S0378874121004748?via%3Dihub#bib32) |
|  | 5 | Punicalin | C34H22O22 | [Wang et al. (2013)](https://www.sciencedirect.com/science/article/pii/S0378874121004748?via%3Dihub" \l "bib127) |
|  | 6 | 1,3-Digalloyl-4,6-HHDP-glucose | C34H26O22 | [Wang et al. (2013)](https://www.sciencedirect.com/science/article/pii/S0378874121004748?via%3Dihub#bib127) |
|  | 7 | 2-O-Digalloyl-1,3,4,6-tetra-O-galloyl-β-D-glucose | C48H36O30 | [Wang et al. (2013)](https://www.sciencedirect.com/science/article/pii/S0378874121004748?via%3Dihub#bib127) |
|  | 8 | Epigallocatechin gallate | C22H18O11 | [Zhou et al. (2016](https://www.sciencedirect.com/science/article/pii/S0378874121004748?via%3Dihub" \l "bib167) |
|  | 9 | Epicatechin gallate | C22H18O10 | [Zhou et al. (2016)](https://www.sciencedirect.com/science/article/pii/S0378874121004748?via%3Dihub#bib167) |
|  | 10 | Benzoic acid, 3,4-dihydroxy-5-[(3,4,  5-trihydroxybenzoyl) oxy]-5-ethoxy  carbonyl-2,3-dihydroxyphenyl ester | C23H18O13 | [Yang et al. (2016](https://www.sciencedirect.com/science/article/pii/S0378874121004748?via%3Dihub" \l "bib150)) |
|  | 11 | Trigallic acid | C21H14O13 | [Yang et al. (2016)](https://www.sciencedirect.com/science/article/pii/S0378874121004748?via%3Dihub#bib150) |
| phenolic acids | 12 | Gallic acid | C7H6O5 | [Li et al. (2008a)](https://www.sciencedirect.com/science/article/pii/S0378874121004748?via%3Dihub" \l "bib172) |
|  | 13 | Protocatechuic acid | C7H6O4 | [Wang et al. (2013](https://www.sciencedirect.com/science/article/pii/S0378874121004748?via%3Dihub#bib127)) |
|  | 14 | 2-Hydroxy-6-pentadecyl benzoic acid | C23H38O3 | [Li et al. (2008a)](https://www.sciencedirect.com/science/article/pii/S0378874121004748?via%3Dihub#bib172) |
|  | 15 | 4-Hydroxy-3-methoxy benzoic acid | C8H8O4 | [Li et al. (2008a)](https://www.sciencedirect.com/science/article/pii/S0378874121004748?via%3Dihub#bib172) |
| amino acids | 16 | Aspartic acid | C4H7NO4 | [Liu et al. (2017)](https://www.sciencedirect.com/science/article/pii/S0378874121004748?via%3Dihub" \l "bib79) |
|  | 17 | Threonine | C4H9NO3 | [Liu et al. (2017)](https://www.sciencedirect.com/science/article/pii/S0378874121004748?via%3Dihub#bib79) |
|  | 18 | Serine | C3H7NO3 | [Liu et al. (2017)](https://www.sciencedirect.com/science/article/pii/S0378874121004748?via%3Dihub#bib79) |
|  | 19 | Glutamic acid | C5H9NO4 | [Liu et al. (2017)](https://www.sciencedirect.com/science/article/pii/S0378874121004748?via%3Dihub#bib79) |
|  | 20 | Proline | C5H9NO2 | [Liu et al. (2017)](https://www.sciencedirect.com/science/article/pii/S0378874121004748?via%3Dihub#bib79) |
|  | 21 | Glycine | C2H5NO2 | [Liu et al. (2017)](https://www.sciencedirect.com/science/article/pii/S0378874121004748?via%3Dihub#bib79) |
|  | 22 | Alanine | C3H7NO2 | [Liu et al. (2017)](https://www.sciencedirect.com/science/article/pii/S0378874121004748?via%3Dihub#bib79) |
|  | 23 | Cystine | C6H12N2O4S2 | [Liu et al. (2017)](https://www.sciencedirect.com/science/article/pii/S0378874121004748?via%3Dihub#bib79) |
|  | 24 | Valine | C5H11NO2 | [Liu et al. (2017)](https://www.sciencedirect.com/science/article/pii/S0378874121004748?via%3Dihub#bib79) |
|  | 25 | Methionine | C5H11NO2S | [Liu et al. (2017)](https://www.sciencedirect.com/science/article/pii/S0378874121004748?via%3Dihub#bib79) |
|  | 26 | Isoleucine | C6H13NO2 | [Liu et al. (2017)](https://www.sciencedirect.com/science/article/pii/S0378874121004748?via%3Dihub#bib79) |
|  | 27 | Leucine | C6H13NO2 | [Liu et al. (2017)](https://www.sciencedirect.com/science/article/pii/S0378874121004748?via%3Dihub#bib79) |
|  | 28 | Tyrosine | C9H11NO3 | [Liu et al. (2017)](https://www.sciencedirect.com/science/article/pii/S0378874121004748?via%3Dihub#bib79) |
|  | 29 | Phenylalanine | C9H11NO2 | [Liu et al. (2017)](https://www.sciencedirect.com/science/article/pii/S0378874121004748?via%3Dihub#bib79) |
|  | 30 | Histidine | C6H9N3O2 | [Liu et al. (2017)](https://www.sciencedirect.com/science/article/pii/S0378874121004748?via%3Dihub#bib79) |
|  | 31 | Lysine | C6H14N2O2 | [Liu et al. (2017)](https://www.sciencedirect.com/science/article/pii/S0378874121004748?via%3Dihub#bib79) |
|  | 32 | Arginine | C6H14N4O2 | [Liu et al. (2017)](https://www.sciencedirect.com/science/article/pii/S0378874121004748?via%3Dihub#bib79) |
| fatty acids | 33 | Oleic acid | C18H34O2 | [Yi and Lei (1998)](https://www.sciencedirect.com/science/article/pii/S0378874121004748?via%3Dihub" \l "bib155) |
|  | 34 | Linoleic acid | C18H32O2 | [Yi and Lei (1998)](https://www.sciencedirect.com/science/article/pii/S0378874121004748?via%3Dihub#bib155) |
|  | 35 | Linolenic acid | C18H30O2 | [Yi and Lei (1998)](https://www.sciencedirect.com/science/article/pii/S0378874121004748?via%3Dihub#bib155) |
|  | 36 | Decanoic acid | C10H20O2 | [Yi and Lei (1998)](https://www.sciencedirect.com/science/article/pii/S0378874121004748?via%3Dihub#bib155) |
|  | 37 | Lauric acid | C12H24O2 | [Yi and Lei (1998)](https://www.sciencedirect.com/science/article/pii/S0378874121004748?via%3Dihub#bib155) |
|  | 38 | Myristic acid | C14H28O2 | [Yi and Lei (1998)](https://www.sciencedirect.com/science/article/pii/S0378874121004748?via%3Dihub#bib155) |
|  | 39 | Palmitic acid | C16H32O2 | [Yi and Lei (1998)](https://www.sciencedirect.com/science/article/pii/S0378874121004748?via%3Dihub#bib155) |
|  | 40 | Stearic acid | C18H36O2 | [Yi and Lei (1998)](https://www.sciencedirect.com/science/article/pii/S0378874121004748?via%3Dihub#bib155) |
| others | 41 | Methyl gallate | C8H8O5 | [Gu (2012)](https://www.sciencedirect.com/science/article/pii/S0378874121004748?via%3Dihub" \l "bib41) |
|  | 42 | Ethyl gallate | C9H10O5 | [Gu (2012)](https://www.sciencedirect.com/science/article/pii/S0378874121004748?via%3Dihub#bib41) |
|  | 43 | Ellagic acid | C14H6O8 | [Gu (2012)](https://www.sciencedirect.com/science/article/pii/S0378874121004748?via%3Dihub#bib41) |
|  | 44 | Myricetin-3-O-rhamnoside | C21H20O12 | [Wang et al. (2013)](https://www.sciencedirect.com/science/article/pii/S0378874121004748?via%3Dihub#bib127) |
|  | 45 | Epigallocatechin | C15H14O7 | [Zhou et al. (2016)](https://www.sciencedirect.com/science/article/pii/S0378874121004748?via%3Dihub#bib167) |
|  | 46 | Ginkgol | C21H34O | [Li et al. (2008a)](https://www.sciencedirect.com/science/article/pii/S0378874121004748?via%3Dihub#bib172) |
|  | 47 | β-Sitosterol | C29H50O | [Li et al. (2008a)](https://www.sciencedirect.com/science/article/pii/S0378874121004748?via%3Dihub#bib172) |
|  | 48 | N-Pentacosane | C25H52 | [Li et al. (2008a)](https://www.sciencedirect.com/science/article/pii/S0378874121004748?via%3Dihub#bib172) |
|  | 49 | Shikimic acid | C7H10O5 | [Yang et al. (2016)](https://www.sciencedirect.com/science/article/pii/S0378874121004748?via%3Dihub#bib150) |

**Supplementary information Table 2.** Potential targets of 49 chemical components from *Galla Chinensis.*

| Chemical composition | Target abbreviation | Target Protein | PDB ID | Score |
| --- | --- | --- | --- | --- |
| 1,2,6-Tri-O-galloyl-  β-D-glucose | slt | Soluble lytic murein transgly  cosylase precursor | 1qsa | 0.4701 |
| ribD | Riboflavin biosynthesis protein ribD | 2o7p | 0.2885 |
| udp | Uridine phosphorylase | 1rxs | 0.2847 |
| 1,2,3,6-Tetra-O-  galloyl-β-D-glucose | hemB | Delta-aminolevulinic acid dehydratase | 1l6s | 0.6443 |
| aspA | Aspartate ammonia-lyase | 1jsw | 0.625 |
| 1,2,4,6-Tetra-O-  galloyl-β-D-glucose | glnE | Glutamate-ammonia-ligase adenylyltransferase | 1v4a | 0.6458 |
| recA | Protein recA | 1u94 | 0.7123 |
| ssuD | Alkanesulfonate monooxygenase | 1m41 | 0.6172 |
| slt | Soluble lytic murein trans  glycosylase precursor | 1qsa | 0.4786 |
| 1,2,3,4,6-Penta-O-  galloyl-β-D-glucose | glnE | Glutamate-ammonia-ligase adenylyltransferase | 1v4a | 0.8037 |
| dnaX | DNA polymerase III subunit tau | 1njf | 0.6099 |
| astB | N-succinylarginine dihydrolase | 1ynh | 0.5942 |
| elbB | Enhancing lycopene biosynthesis protein 2 | 1oy1 | 0.5941 |
| nudC | NADH pyrophosphatase | 2gb5 | 0.5929 |
| Punicalin | glpT | Glycerol-3-phosphate transporter | 1pw4 | 0.9555 |
| dnaA | Chromosomal replication  initiator protein dnaA | 2e0g | 0.9548 |
| ybdL | Aminotransferase ybdL | 1u08 | 0.7861 |
| cyoB | Ubiquinol oxidase subunit 1 | 1fft | 0.7793 |
| 1,3-Digalloyl-4,6-  HHDP-glucose | hemB | Delta-aminolevulinic acid dehydratase | 1l6s | 0.6353 |
| 2-O-Digalloyl-1,3,4,6-tetra-O-galloyl-β-D-glucose | slt | Soluble lytic murein  transglycosylase precursor | 1qsa | 0.4879 |
| ydhF | Oxidoreductase ydhF | 1og6 | 0.3722 |
| Epigallocate  chingallate | moeA | Molybdopterin biosynthesis protein moeA | 2nro | 0.8999 |
| Epicatechin gallate | recE | Exodeoxyribonuclease 8 | 3h4r | 0.6382 |
| frdA | Fumarate reductase flavoprotein subunit | 1l0v | 0.6187 |
| hemB | Delta-aminolevulinic acid dehydratase | 1l6s | 0.609 |
| tyrB | Aromatic-amino-acid aminotransferase | 3fsl | 0.6 |
| Benzoic acid, 3,4-  dihy-droxy-5-[(3,4,  5-trihy-droxybenzoyl)oxy]-5-ethoxycarbonyl-2,3-dihydroxyphenyl ester | ydcF | Protein ydcF | 3ca8 | 0.6629 |
| pyrF | Orotidine 5-phosphate decarboxylase | 1jjk | 0.7003 |
| mgsA | Methylglyoxal synthase | 1b93 | 0.6223 |
| narG | Respiratory nitrate reductase  1 alpha chain | 1r27 | 0.606 |
| Trigallic acid | hemB | Delta-aminolevulinic acid dehydratase | 1l6s | 0.6083 |
| recE | Exodeoxyribonuclease 8 | 3h4r | 0.6011 |
| Gallic acid | alsE | D-allulose-6-phosphate 3-epimerase | 3ctl | 0.5805 |
| aspA | Aspartate ammonia-lyase | 1jsw | 0.5679 |
| ytfQ | ABC transporter periplasmic-binding protein ytfQ | 2vk2 | 0.5408 |
| Protocatechuic acid | alsE | D-allulose-6-phosphate 3-epimerase | 3ctl | 0.5703 |
| ytfQ | ABC transporter periplasmic-binding protein ytfQ | 2vk2 | 0.5303 |
| 2-Hydroxy-6-pentadecyl benzoic acid | emrD | Multidrug resistance protein D | 2gfp | 0.9236 |
| aldA | Lactaldehyde dehydrogenase | 2opx | 0.9887 |
| 4-Hydroxy-3-  methoxybenzoic acid | fabB | 3-oxoacyl-[acyl-carrier-protein] synthase 1 | 1fj4 | 0.6511 |
| Aspartic acid | fdhF | Formate dehydrogenase H | 1aa6 | 0.5794 |
| cheW | Chemotaxis protein cheW | 2ho9 | 0.5607 |
| aspC | Aspartate aminotransferase | 1ase | 0.5329 |
| Threonine | lacY | Lactose permease | 2cfq | 0.3586 |
| Serine | lacI | Lactose operon repressor | 2kei | 0.387 |
| lacY | Lactose permease | 2cfq | 0.3567 |
| tynA | Primary amine oxidase | 1spu | 0.33 |
| era | GTP-binding protein era | 1ega | 0.3254 |
| Glutamic acid | aspA | Aspartate ammonia-lyase | 1jsw | 0.5722 |
| Glycine | era | GTP-binding protein era | 1ega | 0.2794 |
| Alanine | era | GTP-binding protein era | 1ega | 0.2711 |
| Cystine | rob | Right origin-binding protein | 1d5y | 0.6424 |
| ytfQ | ABC transporter periplasmic-binding protein ytfQ | 2vk2 | 0.5946 |
| argK | LAO/AO transport system kinase | 2p67 | 0.5897 |
| Valine | acnB | Aconitate hydratase 2 | 1l5j | 0.3688 |
| Isoleucine | narG | Respiratory nitrate reductase 1 alpha chain | 1siw | 0.5851 |
| Leucine | birA | Bifunctional protein birA synthetase | 1hxd | 0.5626 |
| allE | Uncharacterized protein ylbA | 1rc6 | 0.5254 |
| Tyrosine | icd | Isocitrate dehydrogenase [NADP] | 1ai3 | 0.6455 |
| gadB | Glutamate decarboxylase beta | 3fz7 | 0.5768 |
| birA | Bifunctional protein birA synthetase | 1hxd | 0.5742 |
| narG | Respiratory nitrate reductase 1 alpha chain | 1siw | 0.5712 |
| Phenylalanine | malP | Maltodextrin phosphorylase | 2av6 | 0.5534 |
| Histidine | ytfQ | ABC transporter periplasmic-binding protein ytfQ | 2vk2 | 0.5281 |
| aspC | Aspartate aminotransferase | 1ase | 0.4831 |
| alsE | D-allulose-6-phosphate 3-epimerase | 3ctl | 0.4598 |
| Arginine | dppA | Periplasmic dipeptide transport protein | 1dpp | 0.6326 |
| icd | Isocitrate dehydrogenase [NADP] | 1ai3 | 0.6157 |
| Oleic acid | emrD | Multidrug resistance protein D | 2gfp | 0.9802 |
| aldA | Lactaldehyde dehydrogenase | 2opx | 0.9216 |
| Linoleic acid | napA | Periplasmic nitrate reductase | 2nya | 1 |
| murG | UDP-N-acetylglucosamine--N-acetylmuramyl-(pentapeptide) pyrophosphoryl-undecaprenol N-acetylglucosamine transferase | 1nlm | 1 |
| aldA | Lactaldehyde dehydrogenase | 2opx | 0.8691 |
| Linolenic acid | napA | Periplasmic nitrate reductase | 2nya | 0.9993 |
| miaA | tRNA Delta(2)-isopentenylpyrophosphate transferase | 2zm5 | 0.9994 |
| allC | Allantoate amidohydrolase | 2imo | 0.9985 |
| dinI | DNA-damage-inducible protein I | 1ghh | 0.9994 |
| Decanoic acid | ydcF | Protein ydcF | 3ca8 | 0.7252 |
| Myristic acid | emrD | Multidrug resistance protein D | 2gfp | 0.9402 |
| miaA | tRNA Delta(2)-isopentenylpyrophosphate transferase | 2zm5 | 0.9928 |
| dinI | DNA-damage-inducible protein I | 1ghh | 0.9928 |
| aldA | Lactaldehyde dehydrogenase | 2opx | 0.9229 |
| Palmitic acid | murG | UDP-N-acetylglucosamine--N-acetylmuramyl-(pentapeptide) pyrophosphoryl-undecaprenol N-acetylglucosamine transferase | 1nlm | 0.9916 |
| Stearic acid | emrD | Multidrug resistance protein D | 2gfp | 0.9638 |
| aldA | Lactaldehyde dehydrogenase | 2opx | 0.9435 |
| Methyl gallate | alsE | D-allulose-6-phosphate 3-epimerase | 3ctl | 0.578 |
| aspA | Aspartate ammonia-lyase | 1jsw | 0.4325 |
| hisC | Histidinol-phosphate aminotransferase | 1fg7 | 0.4209 |
| Ellagic acid | glpT | Glycerol-3-phosphate transporter | 1pw4 | 0.7651 |
| frc | Formyl-coenzyme A transferase | 1q6y | 0.6966 |
| Epigallocatechin | tmcA | Uncharacterized protein ypfI | 2zpa | 0.7169 |
| Ginkgol | emrD | Multidrug resistance protein D | 2gfp | 0.9806 |
| aldA | Lactaldehyde dehydrogenase | 2opx | 1 |
| β-Sitosterol | moeA | Molybdopterin biosynthesis protein moeA | 2nro | 0.9926 |
| aldA | Lactaldehyde dehydrogenase | 2opx | 0.9707 |
| emrD | Multidrug resistance protein D | 2gfp | 1 |
| sdhA | Succinate dehydrogenase flavoprotein subunit | 2wdv | 0.9143 |
| yqcC | Uncharacterized protein yqcC | 2hgk | 0.893 |
| Shikimic acid | alsE | D-allulose-6-phosphate 3-epimerase | 3ctl | 0.5842 |
| aspA | Aspartate ammonia-lyase | 1jsw | 0.5692 |
| ytfQ | ABC transporter periplasmic-binding protein ytfQ | 2vk2 | 0.5336 |
| alsE | Nicotinate-nucleotide pyrophosphorylase [carboxylating] | 1qpn | 0.468 |
